# Supplementary material for: Promoter methylation patterns of ABCB1, ABCC1 and ABCG2 in human cancer cell lines, multidrug-resistant cell models and tumor, tumor-adjacent and tumor-distant tissues from breast cancer patients
Source: PubMed Central journal article supplement (PMC5341984; doi:10.18632/oncotarget.12332), 2016-09-28
Supplement: oncotarget-07-73347-s001.pdf [file oncotarget-07-73347-s001.pdf]

## Promoter methylation patterns of *ABCB1*, *ABCC1* and *ABCG2* in human cancer cell lines, multidrug-resistant cell models and tumor, tumor-adjacent and tumor-distant tissues from breast cancer patients

### Supplementary Materials

Supplementary Table S1: Details of cultured cell lines. See Supplementary\_Table\_S1

### Supplementary Table S2: Primary antibodies used for Western Blotting

| Primary antibody | Species          | Clone  | Dilution | Source                 |
|------------------|------------------|--------|----------|------------------------|
| $\beta$ -actin   | Monoclonal mouse | AC-15  | 1:5000   | Sigma Aldrich          |
| ABCC1            | Monoclonal rat   | MRPr1  | 1:20     | Alexis Biochemicals    |
| ABCG2            | Monoclonal mouse | BXP-21 | 1:500    | Chemicon international |
| ABCB1            | Mouse            | C219   | 1:100    | Calbiochem             |
